# Supplementary material
Source: Research Square preprint supplement (doi:10.21203/rs.3.rs-9635701/v1)
Supplement: Supplementary file 1 [file 04f7c1aa4ae15b5eba667d19.docx]

**Supplemental Table 1: Kidney Outcomes by AKI Severity**

|  | **n**  **(%)** | **AKI**  **Stage IIa (N=28)** | **AKI**  **Stage IIIa (N=29)** | **p-valued** |
| --- | --- | --- | --- | --- |
| CKDb | 57 |  |  | p = 0.16 |
| No | 33 (57.9) | 19 (67.9%) | 14 (48.3%) |  |
| Yes | 23 (40.4) | 8 (28.6%) | 15 (51.7%) |  |
| Missing | 1 | 1 | 0 |  |
| CKD Stageb | 57 |  |  | p = 0.40 |
| Stage II | 14 (24.6) | 5 (17.9%) | 9 (31.0%) |  |
| Stage III | 6 (10.5) | 3 (10.7%) | 3 (10.3%) |  |
| Stage IV | 3 (5.3) | 0 (0%) | 3 (10.3%) |  |

| Kidney Recoveryc |  |  |  | p = 0.20 |
| --- | --- | --- | --- | --- |
| No | 17 (29.8) | 6 (21.4%) | 11 (37.9%) |  |
| Yes | 34 (59.6) | 20 (71.4%) | 14 (48.3%) |  |
| Missing | 6 | 2 | 4 |  |
